# Supplementary material
Source: publisher figshare collection journal article supplement (https://tandf.figshare.com/ndownloader/files/17992442)
Supplement: Supplementary file 1 [file 17992442]

## Campaigning in an unprecedented election: Issue competition in the French 2017 presidential election

Romain Lachat and Elie Michel

### Online Appendix

Table A1. List of issue items

---

|                                                   |                                            |
|---------------------------------------------------|--------------------------------------------|
| <i>Positional issues</i>                          |                                            |
| Deregulate the job market                         | Keep current regulations in the job market |
| Lower pension age                                 | Increase pension age                       |
| Reduce income differences                         | Don't reduce income differences            |
| Limit economic globalisation                      | Encourage economic globalisation           |
| Stay in the EU <sup>†</sup>                       | Leave the EU                               |
| Leave the Euro <sup>†</sup>                       | Stay in the Euro                           |
| Abandon nuclear energy                            | Keep using nuclear energy                  |
| Restrict access to abortion                       | Keep access to abortion                    |
| Legalise euthanasia                               | Keep euthanasia illegal                    |
| Repeal gay marriages                              | Keep gay marriages                         |
| Legalise soft drugs                               | Keep soft drugs illegal                    |
| Keep current immigration rules <sup>‡</sup>       | Make immigration rules more restrictive    |
| Restrict welfare for immigrants <sup>‡</sup>      | Keep welfare for immigrants                |
| Accept more refugees <sup>‡</sup>                 | Limit the number of refugees               |
| Forbid Islamic veil in public spaces <sup>‡</sup> | Authorise Islamic veil in public spaces    |
| <i>Valence issues</i>                             |                                            |
| Make France count more in Europe                  |                                            |
| Make EU more democratic                           |                                            |
| Support economic growth                           |                                            |
| Fight corruption                                  |                                            |
| Protect the environment                           |                                            |
| Protect from the terrorist threat                 |                                            |
| Make women's role more important                  |                                            |
| Fight unemployment                                |                                            |
| Improve education                                 |                                            |

---

<sup>†</sup> For the factor analysis, these two items are combined as an additive scale

<sup>‡</sup> For the factor analysis, these four items are combined as an additive scale

Table A2. Candidate-specific effects of issue yield and issue salience on candidates' issue emphases (Tobit regression estimates).

|                                | Model 4  |                  | Model 5  |                  |
|--------------------------------|----------|------------------|----------|------------------|
|                                | Coef.    | Robust std. err. | Coef.    | Robust std. err. |
| Issue yield                    | 0.08***  | 0.00             | 0.07***  | 0.00             |
| Systemic Issue Salience        |          |                  | 0.38***  | 0.00             |
| Candidates (reference: Macron) |          |                  |          |                  |
| Arthaud                        | -0.02*** | 0.00             | -0.12*** | 0.02             |
| Dupont-Aignan                  | -0.00    | 0.00             | -0.09*** | 0.01             |
| Poutou                         | -0.01*** | 0.00             | 0.06***  | 0.00             |
| Hamon                          | 0.00***  | 0.00             | 0.09***  | 0.00             |
| Fillon                         | -0.01*** | 0.00             | -0.12*** | 0.01             |
| Mélenchon                      | -0.03*** | 0.00             | 0.19***  | 0.00             |
| Le Pen                         | -0.04*** | 0.00             | 0.02***  | 0.00             |
| Interactions with issue yield  |          |                  |          |                  |
| Arthaud                        | 0.36***  | 0.02             | 0.27***  | 0.01             |
| Dupont-Aignan                  | -0.05*** | 0.01             | -0.52*** | 0.01             |
| Poutou                         | 0.55***  | 0.03             | 0.46***  | 0.02             |
| Hamon                          | 0.03***  | 0.01             | 0.04***  | 0.00             |
| Fillon                         | 0.11***  | 0.01             | 0.08***  | 0.01             |
| Mélenchon                      | 0.21***  | 0.01             | 0.20***  | 0.01             |
| Le Pen                         | 0.15***  | 0.01             | 0.10***  | 0.01             |
| Interactions with salience     |          |                  |          |                  |
| Arthaud                        |          |                  | 0.14***  | 0.02             |
| Dupont-Aignan                  |          |                  | 0.16***  | 0.01             |
| Poutou                         |          |                  | -0.10*** | 0.00             |
| Hamon                          |          |                  | -0.13*** | 0.00             |
| Fillon                         |          |                  | 0.15***  | 0.01             |
| Mélenchon                      |          |                  | -0.30*** | 0.01             |
| Le Pen                         |          |                  | -0.08*** | 0.01             |
| Constant                       | 0.02***  | 0.00             | -0.25*** | 0.00             |
| N                              | 192      |                  | 192      |                  |
| AIC                            | -225.74  |                  | -277.95  |                  |
| BIC                            | -222.48  |                  | -274.69  |                  |
| Explained variance             | 0.10     |                  | 0.33     |                  |

\*  $p < 0.05$ , \*\*  $p < 0.01$ , \*\*\*  $p < 0.001$ .

Note: Standard errors are clustered by party

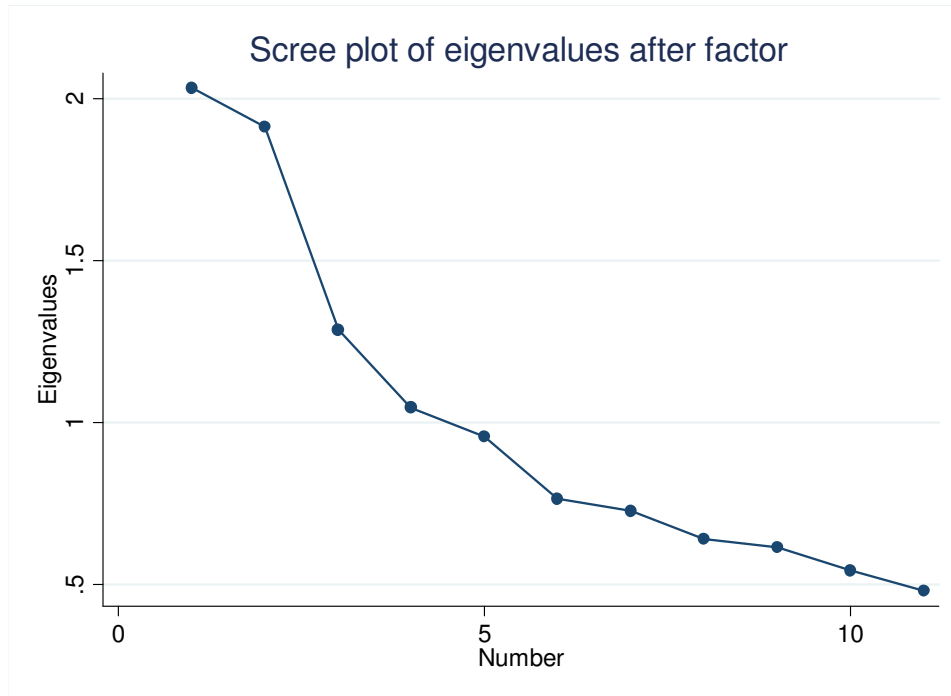

Figure A1. Screeplot for the factor analysis of respondents' issue positions

### Comparison of Twitter data with alternative sources

This paper relies on Twitter data as a source of information about candidates' issue stances, based on the so-called 'press-release assumption' (De Sio *et al.* 2018). That is, we assume that candidates or parties will at least use Twitter as a way to communicate their stances and messages to the media. It does not mean that Twitter represents the main communication channel with voters, but that tweets should reflect the candidates' strategic decisions about which issues to emphasise. As further discussed by De Sio *et al.* (2018), this assumption appears validated by empirical research on parties' communication. Even though data is scarce, this appendix assesses the validity of our data, comparing Twitter data with alternative sources in the context of the 2017 French election. To the best of our knowledge, two other sources can be used to check the validity of our data: one from the Comparative Manifesto Project (CMP), the other from the POLCON project ([www.eui.eu/Projects/POLCON](http://www.eui.eu/Projects/POLCON)), which is based on a content analysis of newspaper reports during the electoral campaign. While all of these data sources focus on the same period, there are important differences in timing, in the type of coded actors, and in the list of issues used to code actors' political statements. For the CMP dataset, the programmes of three presidential candidates have been coded, whereas we have to resort to their parties' programmes for the subsequent legislative elections in the case of the Parti Socialiste and Les Républicains. In the case of the POLCON project, the coding is at the level of parties or party groups (such as extreme-left or extreme-right parties).

While these are likely to be dominated by the corresponding presidential candidate (Mélenchon and Le Pen), it may also involve other party representatives. In addition, while the categories of issues used by these other two projects are relatively close to ours for some issues, the correspondence is far from being always perfect. Such a comparison should be taken cautiously, as the comparability of these various data sources to include them in the paper is imperfect. We provide here a comparison of the most salient issue categories by party. The following table shows that the most salient issues are generally the same for the major candidates in the manifestos, tweeter feeds, and newspaper articles dealing with the campaign. The table shows the correspondence of the top-5 salient issues in each data collection. Our Twitter data in the third column is marked in bold if it corresponds to a top-5 salient issue of the CMP, and in italics for correspondence with POLCON. Overall 20 of the 25 top salient candidates' issues on Twitter are found in one of the other database, and 10 out of 25 are found in both CMP and POLCON.

Table A3. Most salient issues in CMP, POLCON, and Twitter data, by party

| Party                  | CMP                                                                                                                                                                               | POLCON                                                                                                    | Tweets                                                                                                                                                   |
|------------------------|-----------------------------------------------------------------------------------------------------------------------------------------------------------------------------------|-----------------------------------------------------------------------------------------------------------|----------------------------------------------------------------------------------------------------------------------------------------------------------|
| La France<br>Insoumise | <b>Labor Group Positive</b><br><b>Environmental Protection</b><br><b>Equality Positive</b><br><b>Market Regulation</b><br><b>Education Expansion</b>                              | <i>Econ. liberalism</i><br>Democratic reform<br><i>Welfare</i><br><i>Education</i><br><i>Econ. Reform</i> | <b><i>Job market regulation</i></b><br><b><i>Environment</i></b><br><b><i>Income differences</i></b><br><b><i>Education</i></b><br><b><i>Nuclear</i></b> |
| Parti<br>Socialiste    | <b>Welfare State Expansion</b><br>Law and Order Positive<br><b>Equality Positive</b><br><b>Labor Group Positive</b><br>Anti-Growth                                                | <i>Econ. liberalism</i><br>Security<br>Welfare<br><i>Europe</i><br>Democratic reform                      | <b><i>Income differences</i></b><br>Education<br>Environment<br><i>EU stay/leave</i><br><i>EU democracy</i>                                              |
| En Marche              | Equality Positive<br>Governmental and<br>Administrative Efficiency<br><b>Education Expansion</b><br><b>Labor Group Positive</b><br><b>Welfare State Expansion</b>                 | <i>Welfare</i><br><i>Econ. liberalism</i><br>Environment<br>Democratic reform<br>Cult. liberalism         | <b>Education</b><br>Terrorism<br><i>Job market regulation</i><br><i>EU stay/leave</i><br><b>Unemployment</b>                                             |
| Républicains           | <b>Law and Order Positive</b><br><b>Labor Group Positive</b><br>Political Authority<br><b>Equality Positive</b><br>National way of Life<br>positive                               | <i>Econ. liberalism</i><br>Security<br>Democratic renewal<br>Europe<br>Environment                        | <b>Terrorism</b><br><i>Job market regulation</i><br><b>Unemployment</b><br>Education<br><i>EU stay/leave</i>                                             |
| Front<br>National      | <b>National way of Life</b><br><b>positive</b><br><b>Law and Order Positive</b><br><b>Welfare State Expansion</b><br><b>Labor Group Positive</b><br><b>Protectionism Positive</b> | Econ. liberalism<br><i>Europe</i><br><b>Immigration</b><br>Economic reform<br><i>Welfare</i>              | <b>Terrorism</b><br><b>Immigration rules</b><br><b>Economic globalisation</b><br><i>EU stay/leave</i><br><b>Welfare migrants</b>                         |
